# Supplementary material
Source: PubMed Central journal article supplement (PMC2593722)
Supplement: rspb20071394s12.pdf [file rspb20071394s12.pdf]

**Table 2.** Chromaticity coordinates for stimuli used for the observers A, B, C and F. Values in brackets give the contrast for the stimulus, as a function of the contrast threshold determined in Fig. 1. Observers D & E used a +M stimulus whose chromaticity coordinates were as for Subject A.

| <b>stimulus</b> | <b>Subject A</b>                         | <b>Subject B</b>                         | <b>Subject C</b>                         | <b>Subject F</b>                          |
|-----------------|------------------------------------------|------------------------------------------|------------------------------------------|-------------------------------------------|
| +S              | l= 0.675<br>s= 0.0325<br>(10x threshold) | l= 0.674<br>s= 0.0394<br>(10x threshold) | l= 0.678<br>s= 0.0358<br>(10x threshold) | l= 0.675<br>s= 0.0402<br>(10x threshold)  |
| +M              | l= 0.629<br>s= 0.0161<br>(5x threshold)  | l= 0.619<br>s= 0.0161<br>(5x threshold)  | l= 0.625<br>s= 0.0161<br>(5x threshold)  | l= 0.612<br>s= 0.0161<br>(5.5x threshold) |
